# Supplementary material for: Fabrication of UV-Stable Perovskite Solar Cells with Compact Fe2O3 Electron Transport Layer by FeCl3 Solution and Fe3O4 Nanoparticles
Source: MDPI journal article supplement (doi:10.3390/nano12244415), 2022-12-10
Supplement: s1 [file s1]

# Fabrication of UV-Stable Perovskite Solar Cells with Compact $\text{Fe}_2\text{O}_3$ Electron Transport Layer by $\text{FeCl}_3$ Solution and $\text{Fe}_3\text{O}_4$ Nanoparticles

Bangkai Gu <sup>1,2,†</sup>, Yi Du <sup>2,†</sup>, Song Fang <sup>2</sup>, Xi Chen <sup>2</sup>, Xiabing Li <sup>2</sup>, Qingyu Xu <sup>1,\*</sup> and Hao Lu <sup>2,\*</sup>

<sup>1</sup> School of Physics, Southeast University, Nanjing 211189, China

<sup>2</sup> School of Materials Science and Engineering, Suzhou University of Science and Technology, Suzhou 215009, China

\* Correspondence: xuyingyu@seu.edu.cn (Q.X.); haolu@usts.edu.cn (H.L.)

† These authors contributed equally to this work.

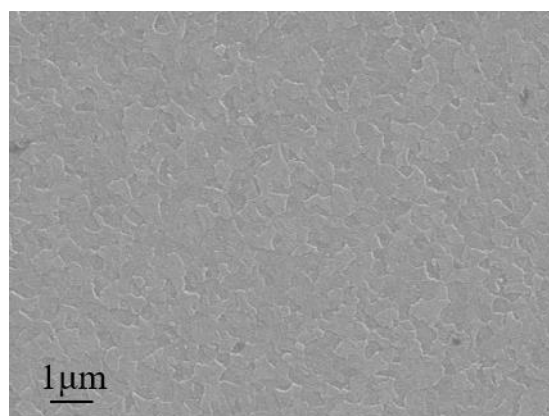

Figure S1. Top view SEM images of pure ITO.

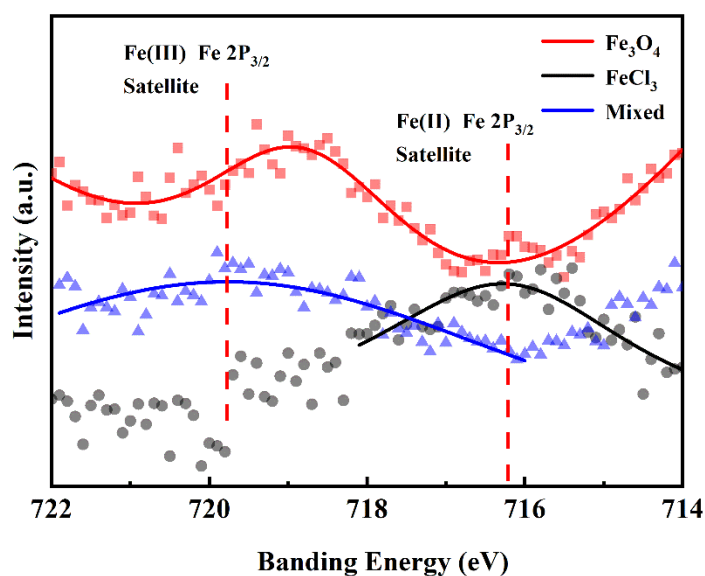

Figure S2. Fitted curves of the Fe  $2\text{P}_{3/2}$  of  $\text{Fe}_2\text{O}_3$  films prepared by different methods.

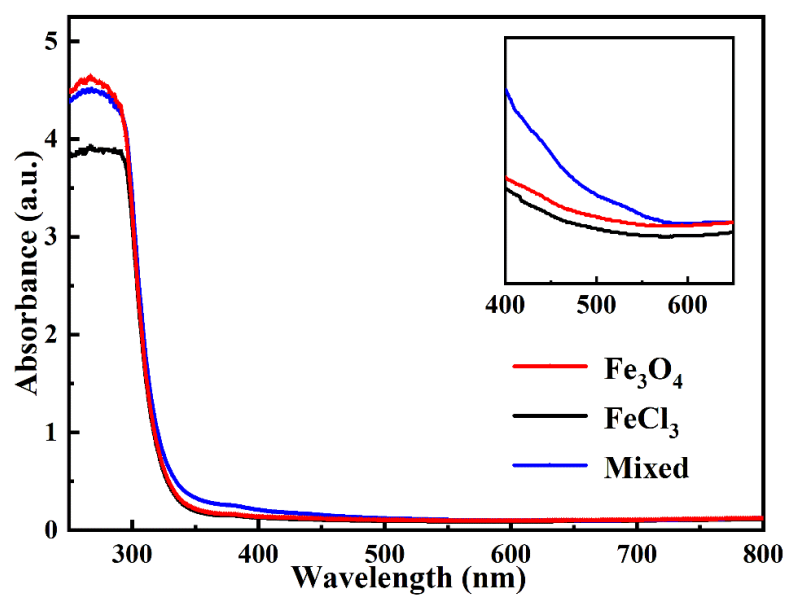

Figure S3. UV-vis absorption spectra of  $\text{Fe}_2\text{O}_3$  films prepared by different methods.

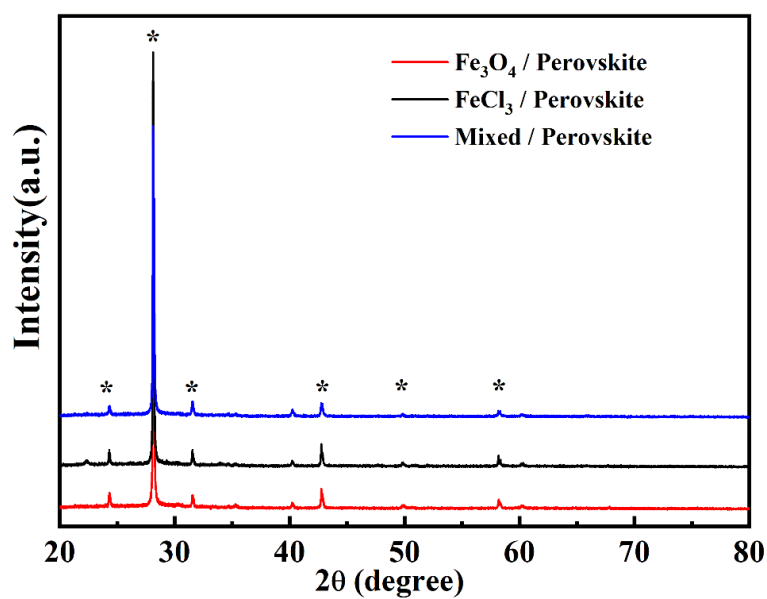

Figure S4. XRD patterns of perovskite coated on different substrates.

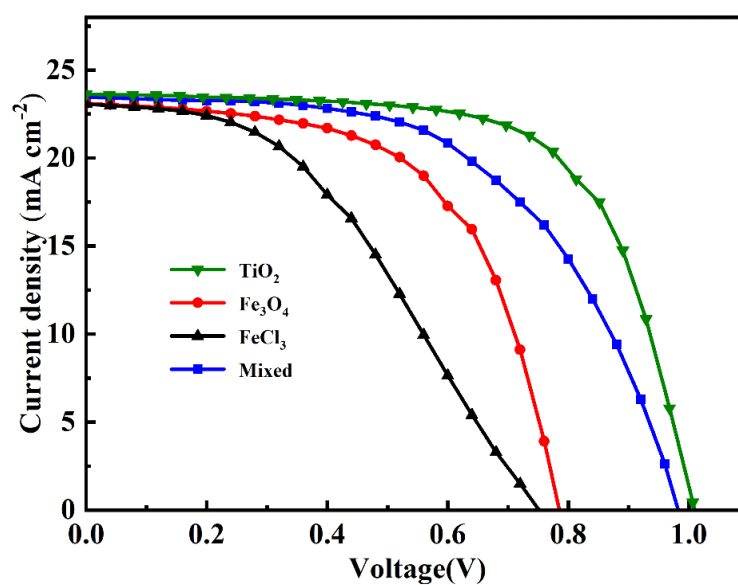

Figure S5.  $J$ - $V$  curves of PSCs based on  $\text{Fe}_2\text{O}_3$  and  $\text{TiO}_2$  ETLs.

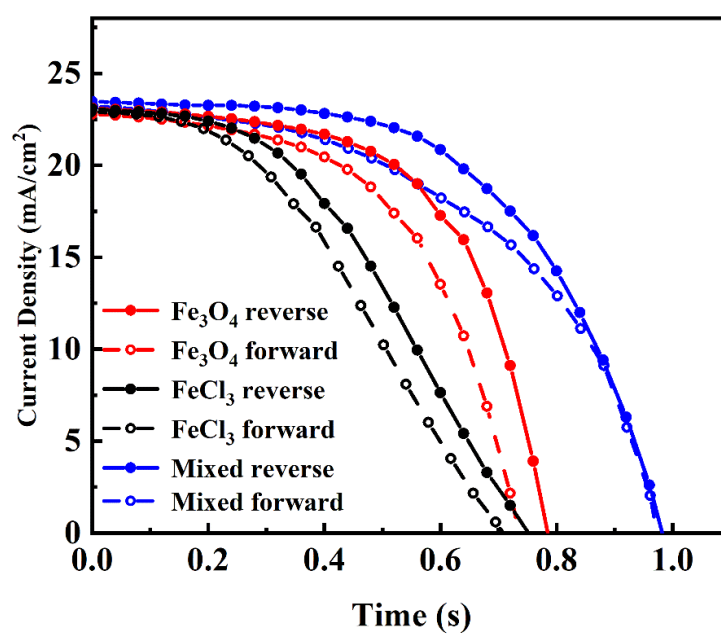

Figure S6. Hysteresis measurement of PSCs based on  $\text{Fe}_2\text{O}_3$  prepared by different methods.

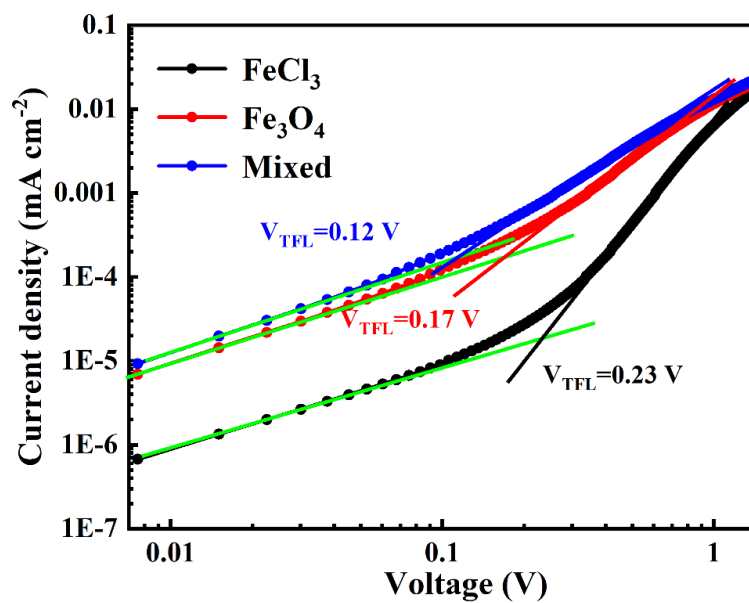

**Figure S7.** Current-voltage curves of the PSCs with a structure of ITO/HTMs/perovskite/spiro-OMeTAD/Ag.

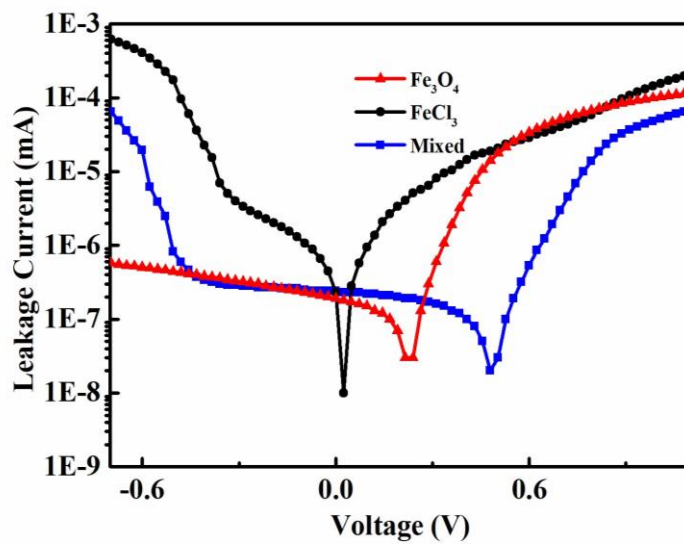

**Figure S8.** Leakage current measurement of PSCs based on the  $\text{Fe}_2\text{O}_3$  ETLs prepared by different methods.

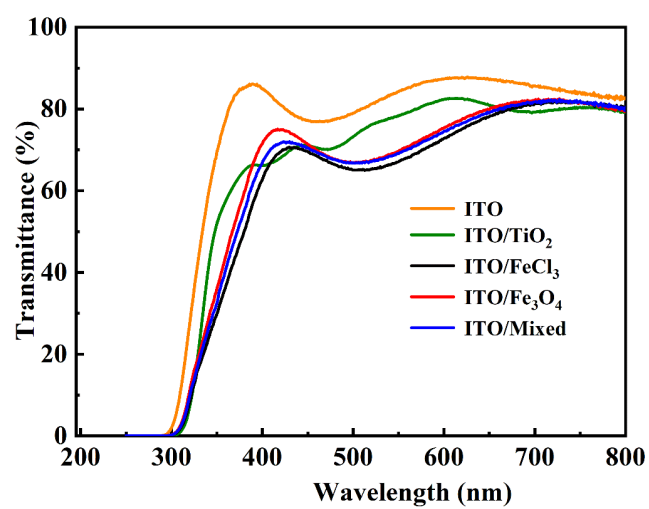

**Figure S9.** Transmittance spectra of TiO<sub>2</sub> and Fe<sub>2</sub>O<sub>3</sub> films prepared by different methods.

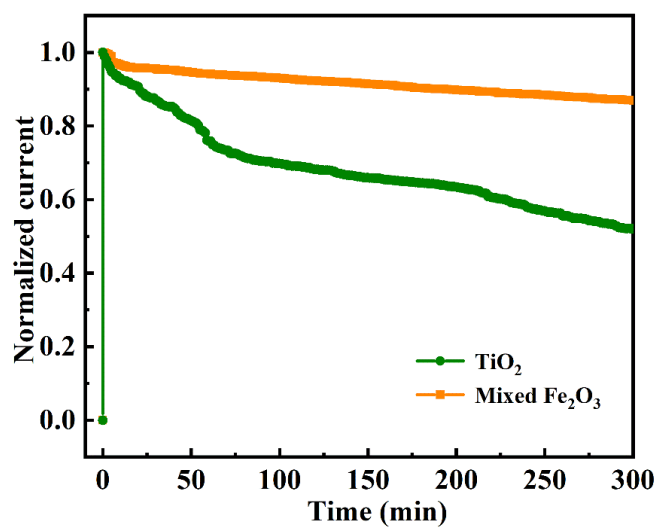

**Figure S10.** The continuous illumination stability of the TiO<sub>2</sub> and mixed Fe<sub>2</sub>O<sub>3</sub> based devices under UV illumination without encapsulation.

**Table S1.** Summary of photovoltaic parameters of the PSCs based on the control TiO<sub>2</sub> ETLs and Fe<sub>2</sub>O<sub>3</sub> ETLs prepared by different methods (30 Devices Tested in the Reversed Direction).

| Devices                        |         | $V_{oc}$ (V) | $J_{sc}$<br>(mA cm <sup>-2</sup> ) | FF (%)       | PCE<br>(%)  |
|--------------------------------|---------|--------------|------------------------------------|--------------|-------------|
| TiO <sub>2</sub>               | Best    | 1.01         | 23.64                              | 66.17        | 15.50       |
|                                | Average | 0.99± 0.02   | 22.91± 0.73                        | 64.85± 1.32  | 14.47± 1.03 |
| Fe <sub>3</sub> O <sub>4</sub> | Best    | 0.78         | 23.12                              | 58.63        | 10.64       |
|                                | Average | 0.74 ± 0.04  | 22.17 ± 0.95                       | 55.58 ± 3.05 | 9.15 ± 1.49 |
| FeCl <sub>3</sub>              | Best    | 0.77         | 23.10                              | 43.52        | 7.72        |
|                                | Average | 0.73 ± 0.04  | 22.38 ± 0.72                       | 41.57 ± 1.95 | 6.30 ± 1.42 |
| Mixed                          | Best    | 0.98         | 23.45                              | 54.74        | 12.61       |
|                                | Average | 0.95 ± 0.03  | 22.89 ± 0.56                       | 52.66 ± 2.08 | 11.56 ±1.05 |

**Table S2.** Summary of the fitted parameters of solar cells based on the Fe<sub>2</sub>O<sub>3</sub> ETLs prepared by different methods.

| Devices                        | $R_s$ ( $\Omega$ ) | $R_{ct}$ ( $\Omega$ ) | $R_{rec}$ ( $\Omega$ ) | $\tau$ (ns) |
|--------------------------------|--------------------|-----------------------|------------------------|-------------|
| Fe <sub>3</sub> O <sub>4</sub> | 58.2               | 270                   | 573                    | 20.28       |
| FeCl <sub>3</sub>              | 54.5               | 212                   | 620                    | 7.76        |
| Mixed                          | 25.4               | 178                   | 1023                   | 12.29       |
